# Supplementary material
Source: publisher site journal article supplement (https://www.dovepress.com/get_supplementary_file.php?f=+403058.docx)
Supplement: Supplementary file 1 [file get_supplementary_file.php]

**1. CHEMICAL CHARACTERIZATION OF FULLERENE NANOMATERIAL**

**1.1 MOLECULAR DOCKING AND MD SIMULATIONS**

**1.2 NMR SPECTRA**

**1.3 FT-IR SPECTRA**

**1.4 MASS SPECTROMETRY**

**1.5. DLS MEASUREMENTS**

**1.6 XPS SPECTROSCOPY**

**2. BIOLOGICAL STUDIES**


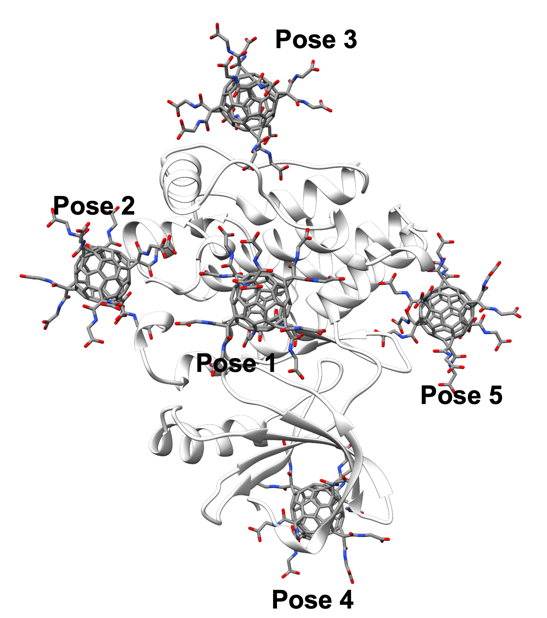


**Figure S1** The possible binding site of HDGF in BTK, identified by docking.

1H-NMR(*d1-CDCl3, ppm, 500 MHz*): 3.96(d, *J*= 5.2 Hz, 4H, -CH2); 3.29(s, 2H, O=C-CH2-C=O); 1.49(s, 9H, *t*-Bu).

13C-NMR(*d1-CDCl3, ppm, 125 MHz*): 168.59; 167.11; 82.46; 42.25; 42.15; 28.03


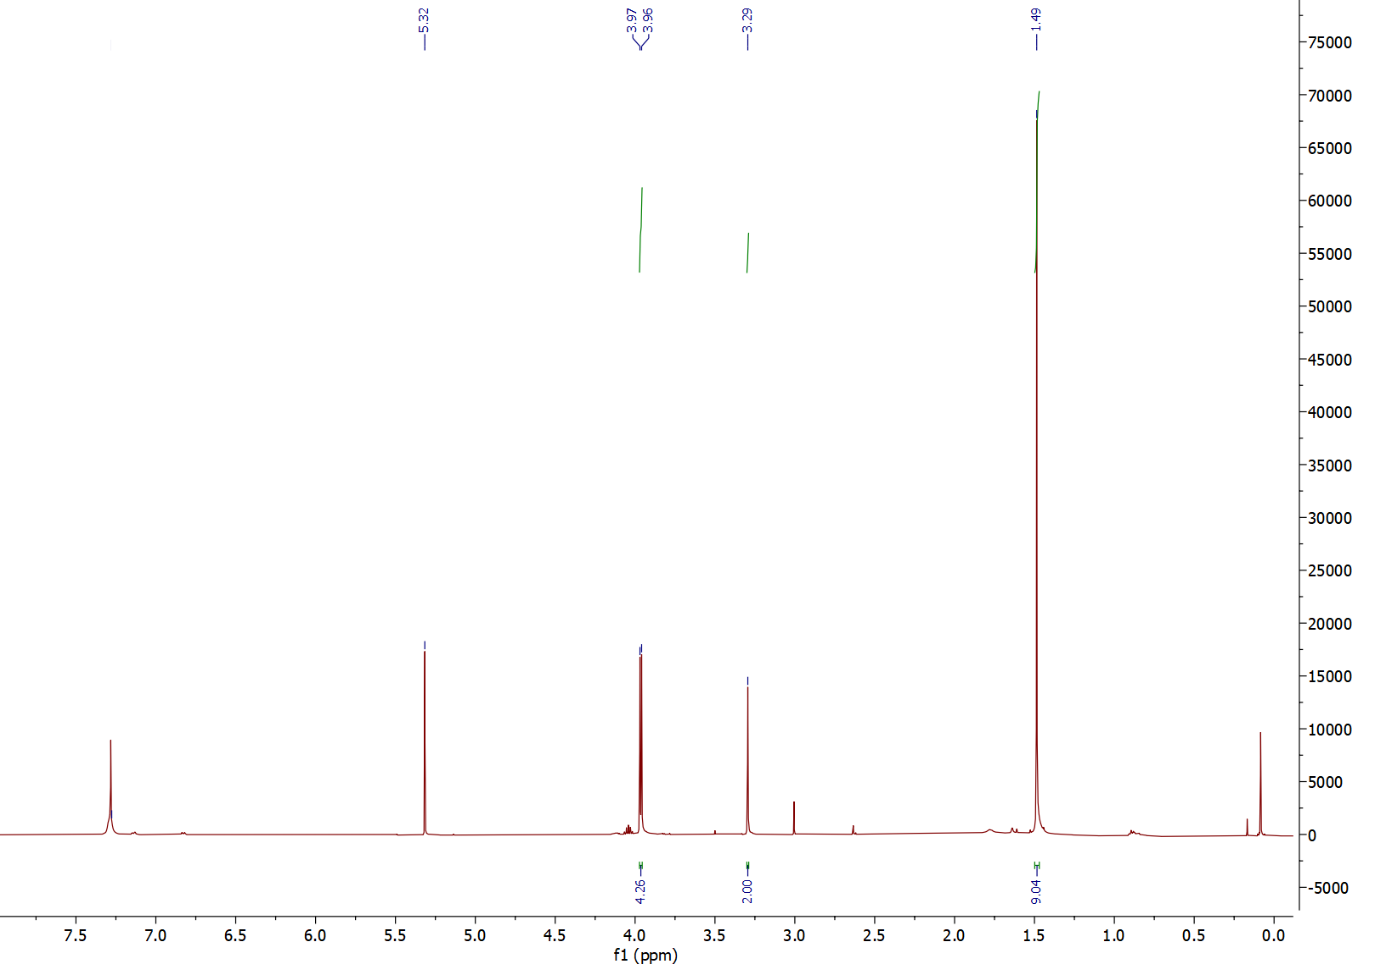


**Figure S2**

1H-NMR spectrum of malonate 1.


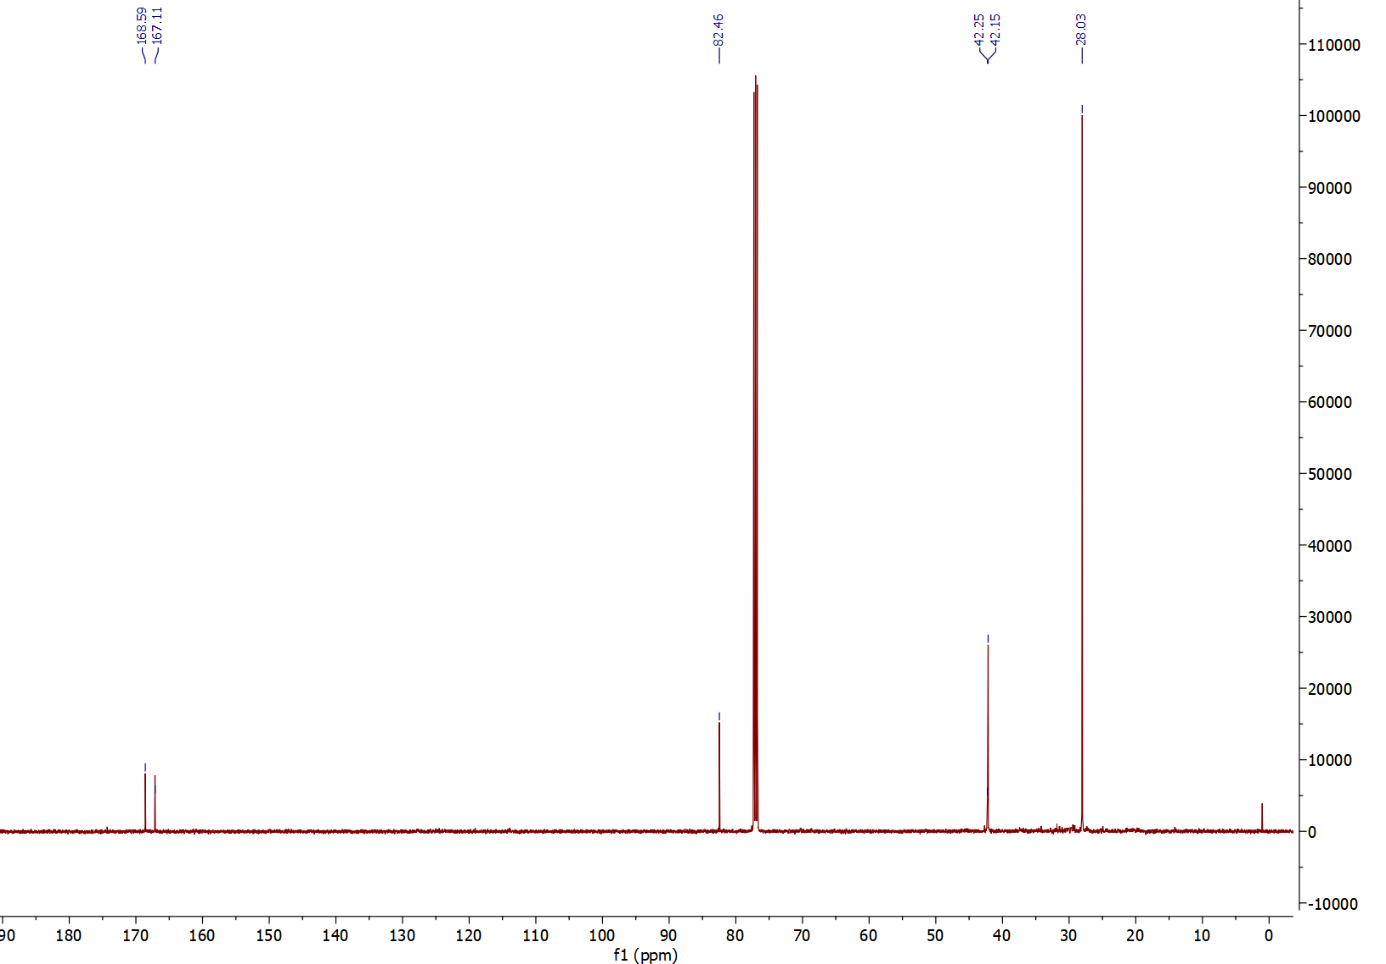


**Figure S3**

13C-NMR spectrum of malonate (1).

1H-NMR(*d1-CDCl3, ppm, 500 MHz*): 3.98(d, *J*= 5.2 Hz, 4H); 1.49(s, 9H, *t*-Bu).

13C-NMR(*d1-CDCl3, ppm, 125 MHz*):169.60(COOR); 168.64(COOR); 164.94(NH-C=O); 145.83(C60-sp2); 145.73(C60-sp2); 145.32(C60-sp2); 145.17(C60-sp2); 144.71(C60-sp2); 144.52(C60-sp2); 143.81(C60-sp2); 142.98(C60-sp2); 142.21(C60-sp2); 142.20(C60-sp2); 142.13(C60-sp2); 142.11(C60-sp2); 140.98(C60-sp2); 140.95(C60-sp2); 139.29(C60-sp2); 82.43(C(CH3)3); 71.51(C60-sp3); 42.15; 42.05; 29.66; 28.12 (C(CH3)3.


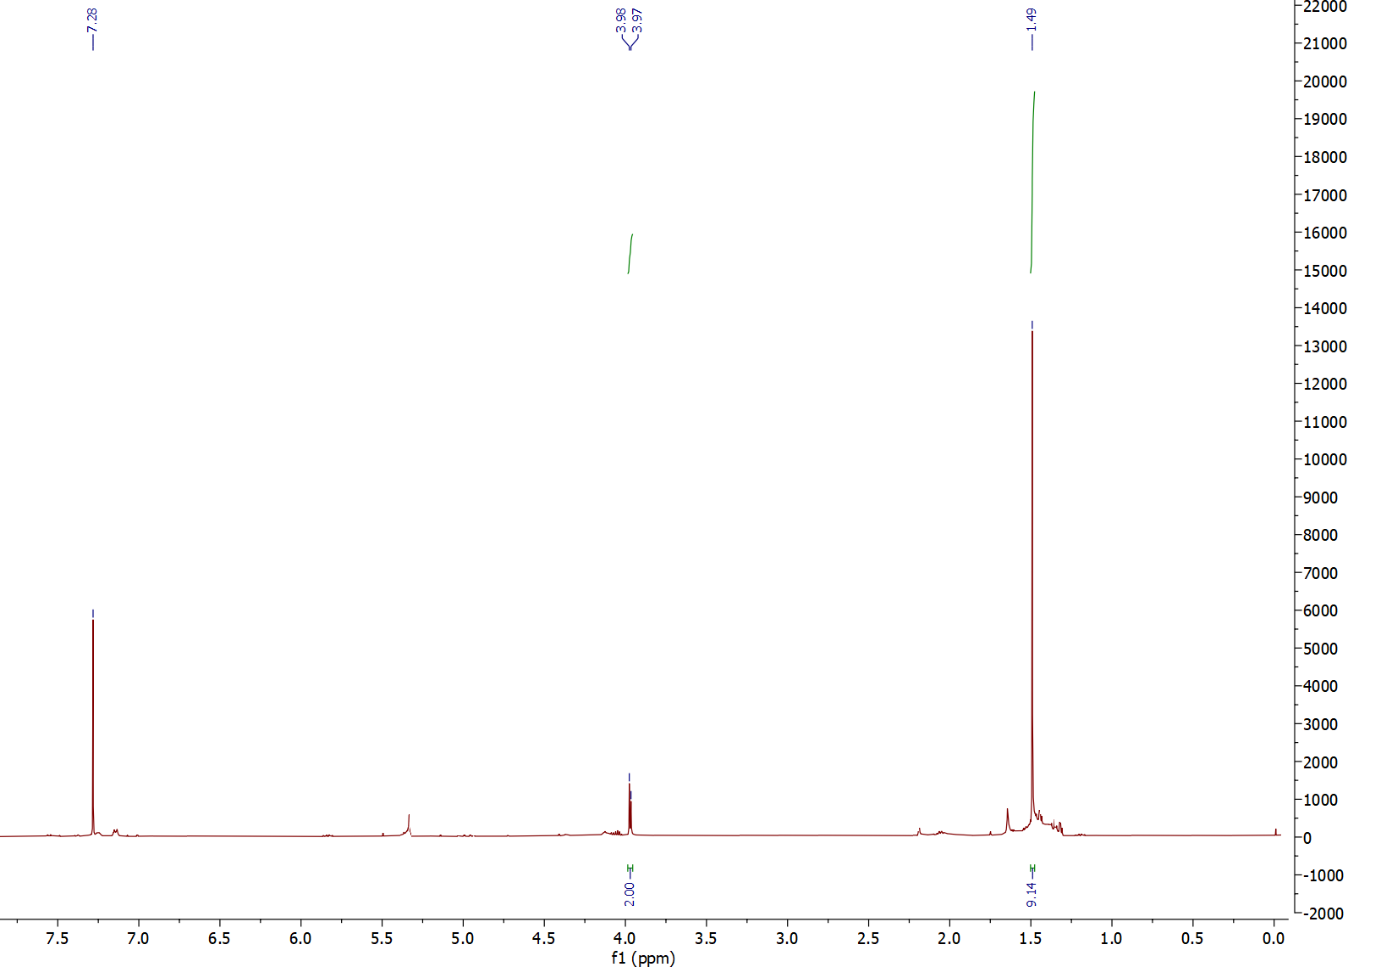


**Figure S4**

1H-NMR spectrum of [60]fullerene monoadduct 2


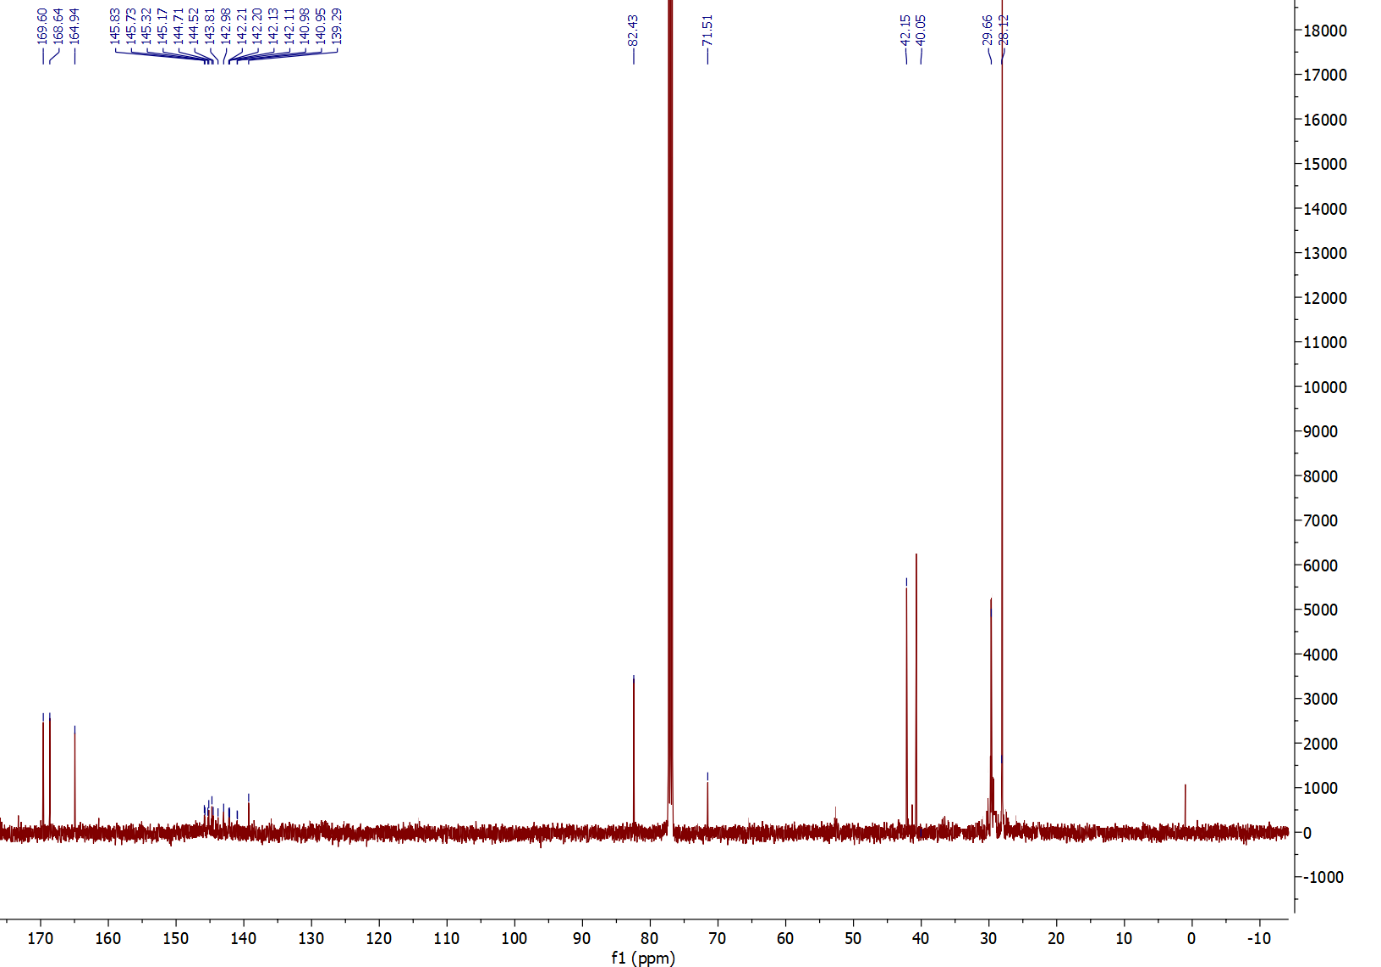


**Figure S5**

13C-NMR spectrum of [60]fullerene monoadduct 2

13C-NMR(*d2-D2O, ppm, 125 MHz*): 174.5; 169.76; 145.23; 141.56; 71.63; 40.66


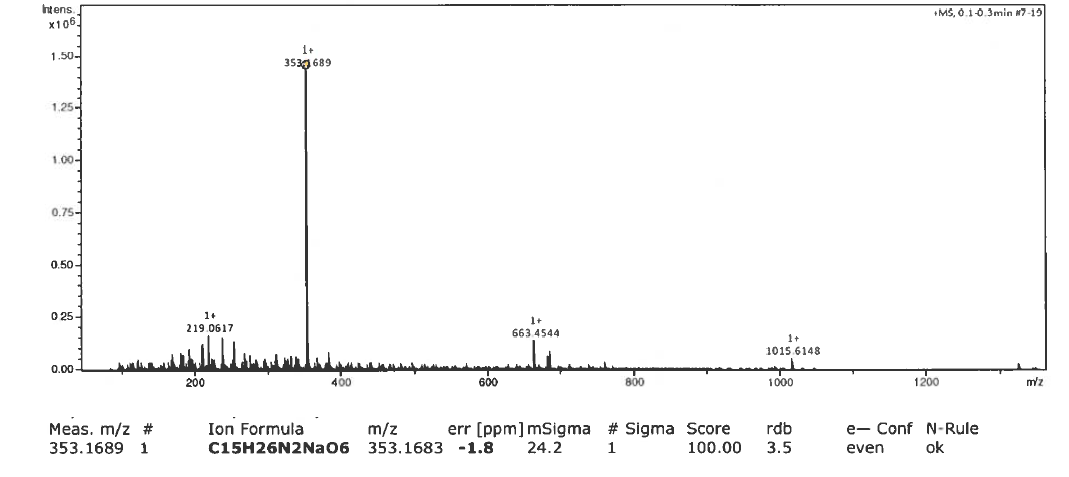


**Figure S6**

HRMS spectrum of malonate (**1**).

**
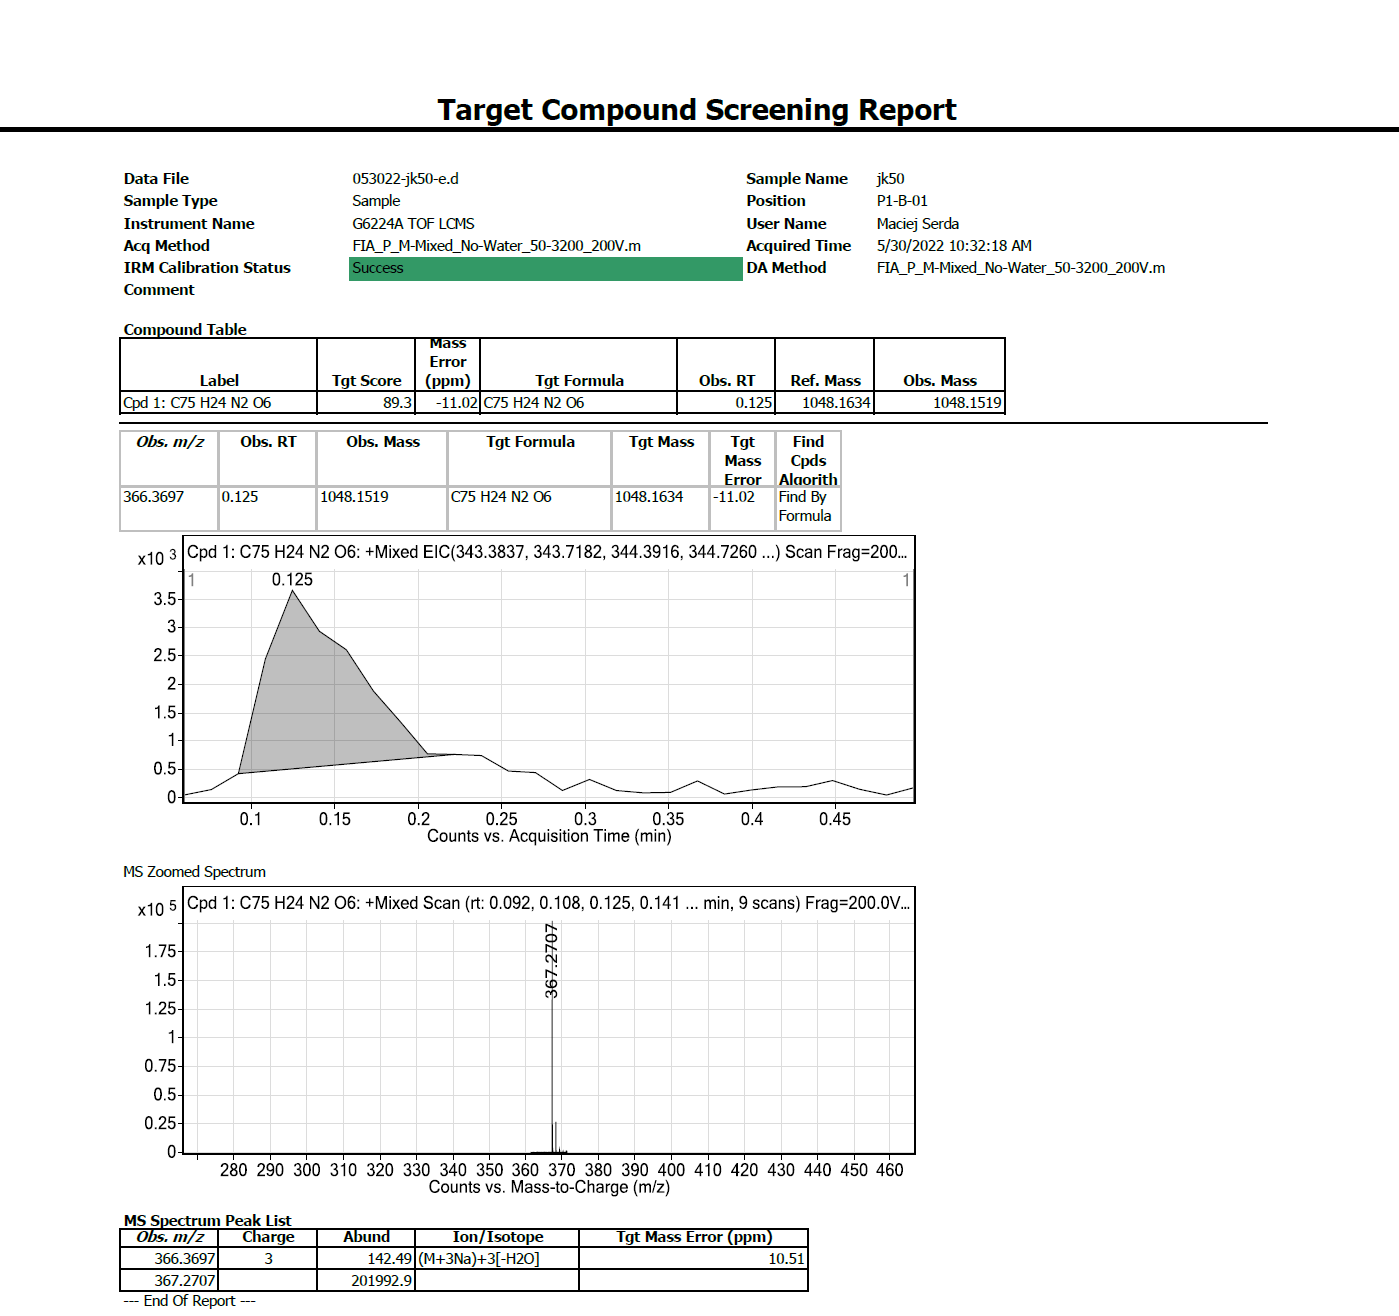
**

**Figure S7**

HRMS spectrum of fullerene monoadduct (**2**).

**
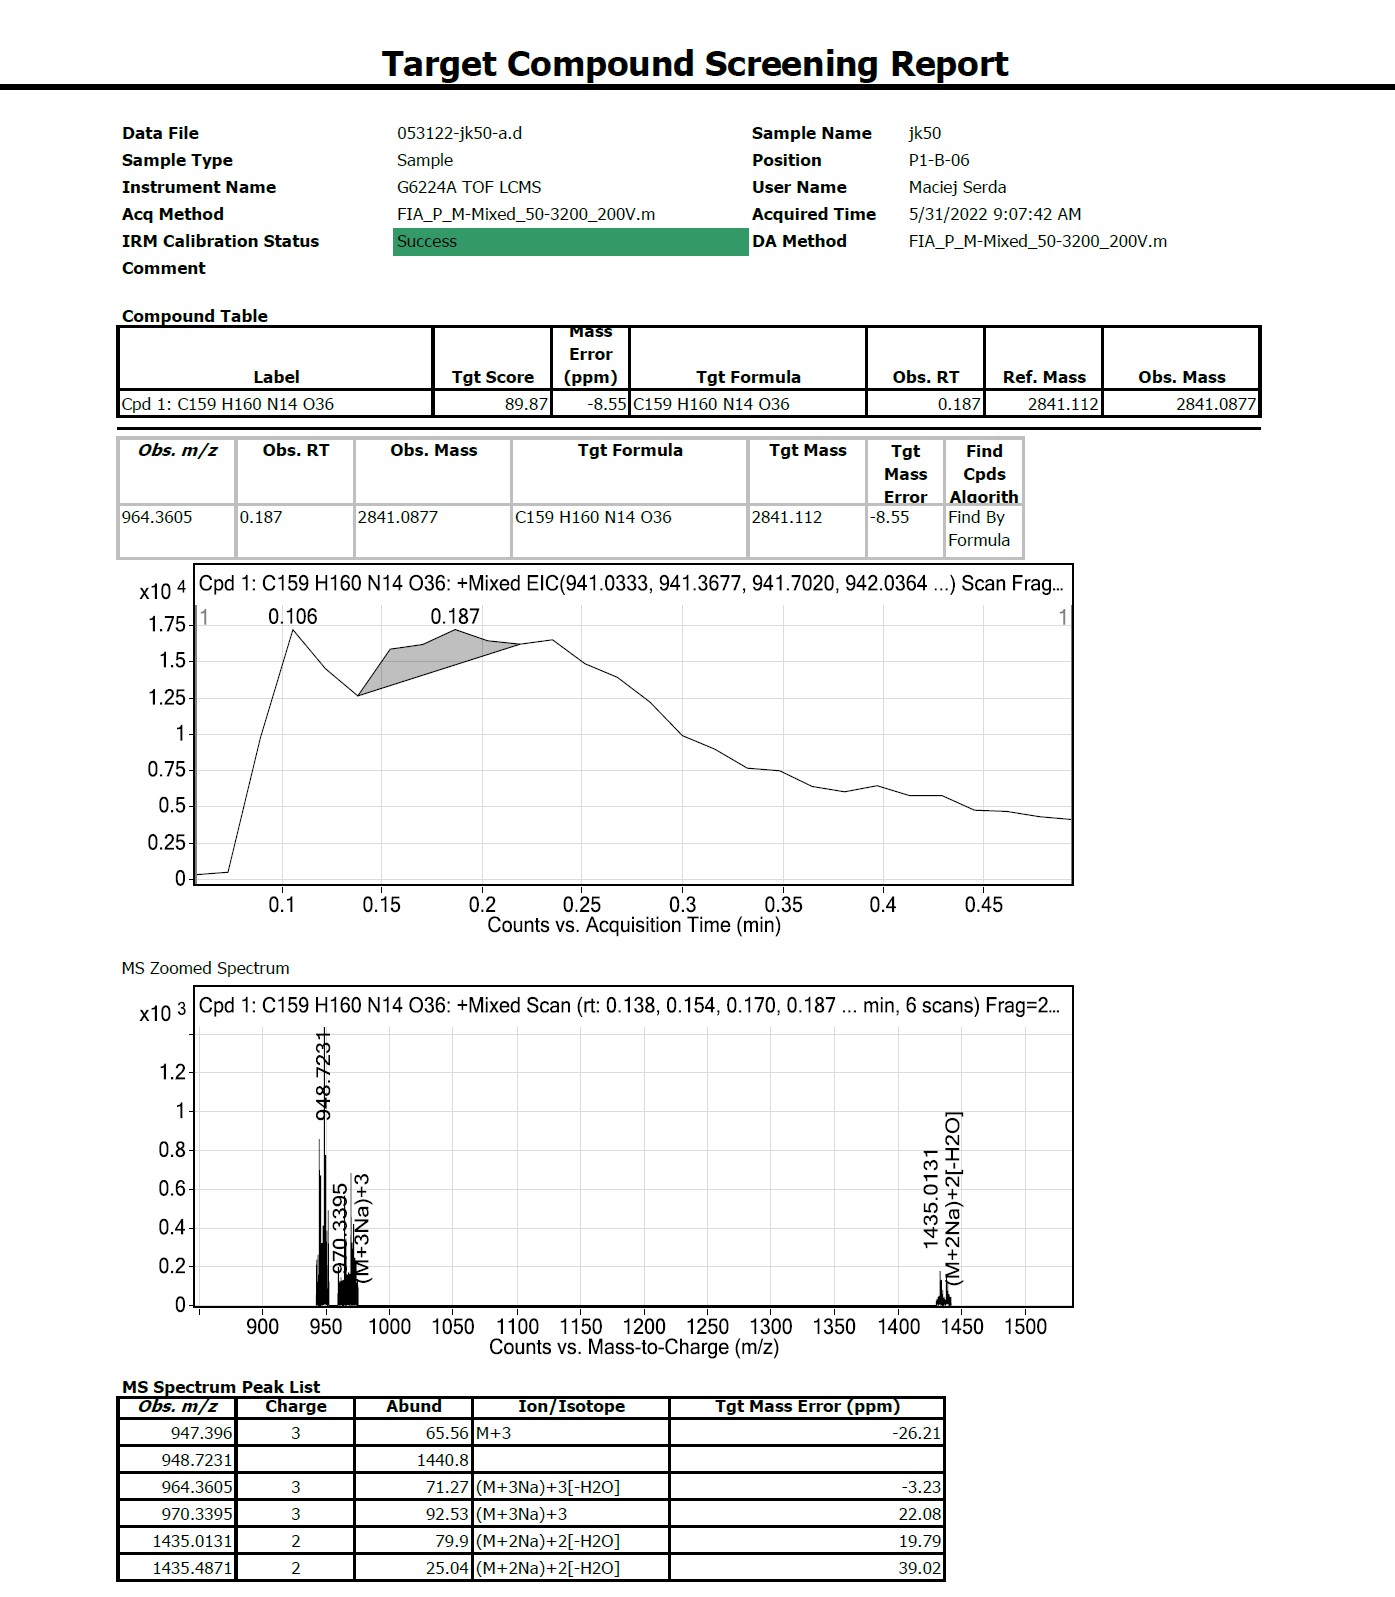
**

**Figure S8**

Spectrum of fullerene hexakisadduct (**3**)



**Figure S9**

A high-resolution XPS spectrum of O1s line of HDGF

**
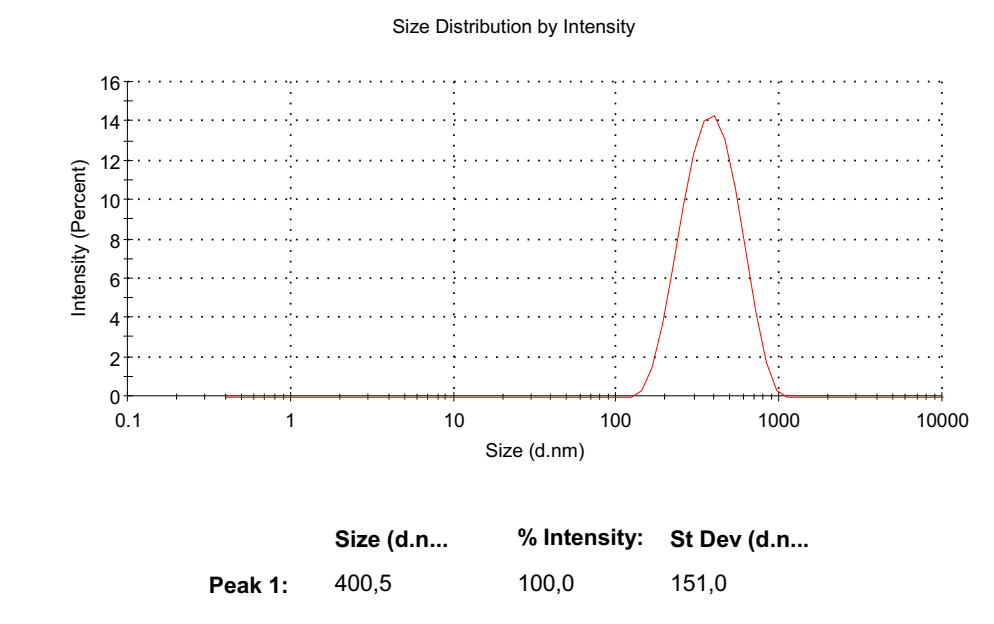
**

**Figure S10**

DLS measurement of the fullerene nanomaterial HDGF at pH=3 (c=0.1 mg/mL)


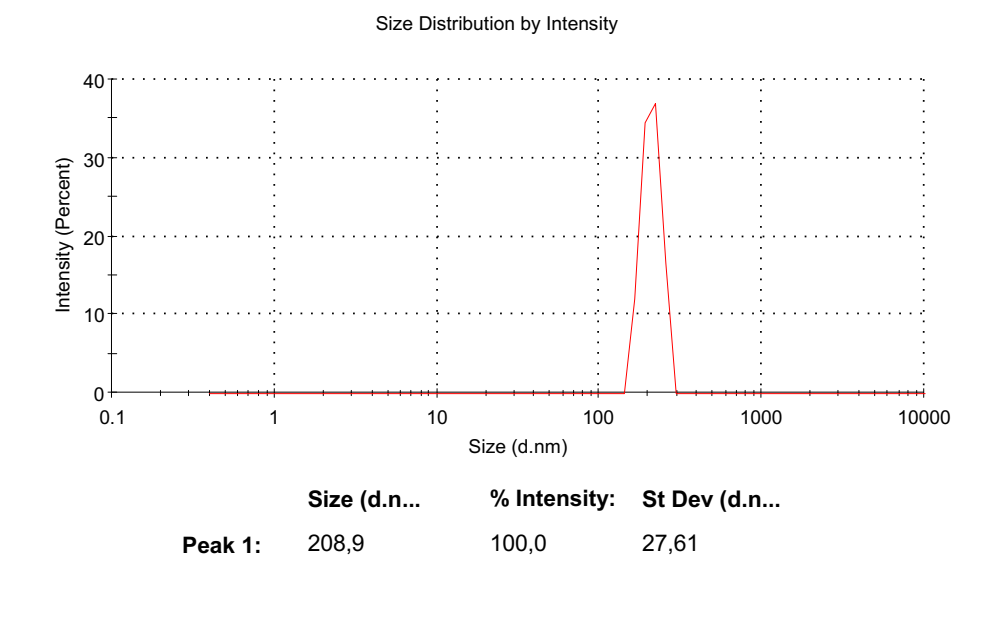


**Figure S11**

DLS measurement of the fullerene nanomaterial HDGF at pH=6 (c=0.1 mg/mL)


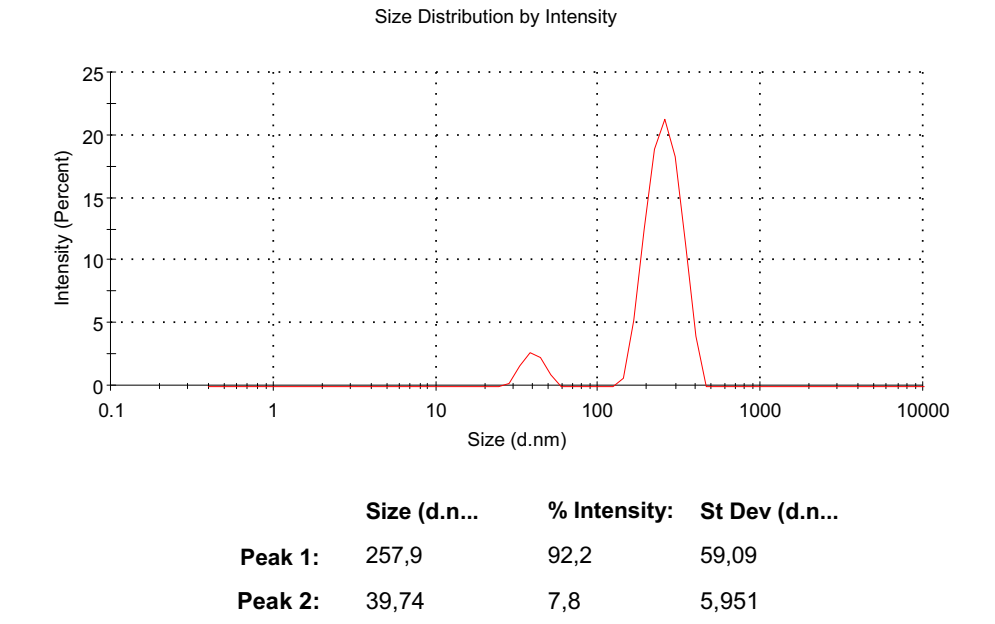


**Figure S12**

DLS measurement of the fullerene nanomaterial HDGF at pH=9 (c=0.1 mg/mL)


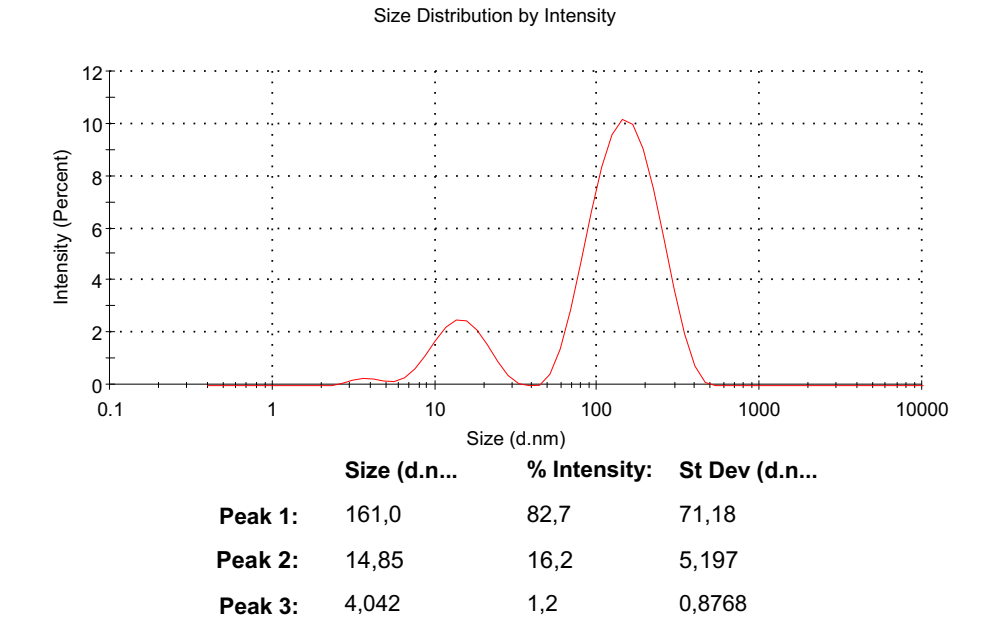


**Figure S13**

DLS measurement of the fullerene nanomaterial HDGF in cellular medium containing FBS (c=0.1 mg/mL, day 0)


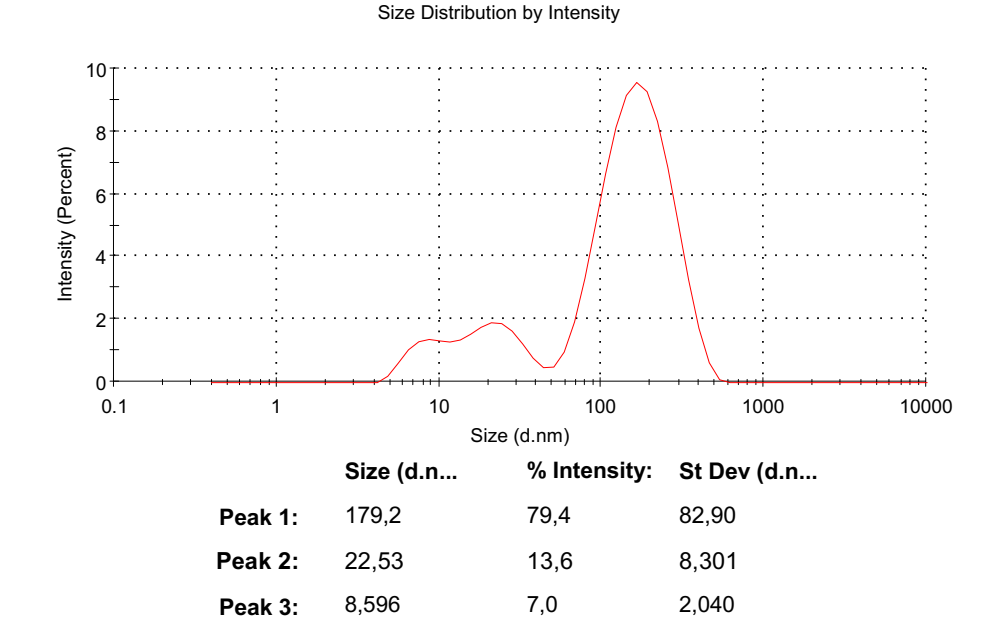


**Figure S14**

DLS measurement of the fullerene nanomaterial HDGF in cellular medium containing FBS (c=0.1 mg/mL, day 3)

| **Element** | **Atomic concentration**  **(at. %)** | **Assigned bond** | **Binding energy**  **(eV)** | **Contribution of individual chemical bonds for the given element**  **(%)** | **The approximate atomic concentration of individual chemical bond**  **(at. %)** |
| --- | --- | --- | --- | --- | --- |
| **C** | 71.90 | Si–C | 282.6 | 3.91 | 2.8 |
| C–C, C–H | 284.8 | 85.14 | 61.2 |
| C–O, C–N, to –C–OH | 286.6 | 6.38 | 4.6 |
| C=O | 288.0 | 4.56 | 3.3 |
| **N** | 3.73 | Pyridinic N | 398.4 | 18.47 | 0.2 |
| C–N, N–(C=O)– | 399.8 | 81.53 | 3.0 |
| **O** | 20.32 | Atomic oxygen | 529.2 | 2.79 | 0.5 |
| C=O, O=C–OH | 530.6 | 4.74 | 0.9 |
| C–O, C–O–C, O–H, Si–O | 532.5 | 92.47 | 18.8 |
| **Si** | 4.06 | Si–O | ~102.0 | 4.06 | 4.1 |

**Table S1**

Chemical composition, atomic concentration, and percentage contributions of chemical state for particular element obtained from the XPS measurements.

| Gene | Forward primer (5’→3’) | Reverse primer (3’→5’) |
| --- | --- | --- |
| *BTK* | ACAGATTCCGAGGAGAGGTGAGG | GGTCCTTCATCATATACAACCTGGAATGG |
| *TLR8* | ACCACCTCAGTCCAGGGAAA | CGAACGCAACCACAGCATAA |
| *NFAT* | GATGCCAAGCACCAGCTTTC | TGTTGTGGTACAGGCCCAAG |
| *ARID3A* | AGCATTCGGATCAACAGCCA | CCGTATCTTCCGCCATCCTG |
| *LC3* | CAGCATCCAACCAAAATCCC | CACTGACAATTTCATCCCGAAC |
| *p62* | AGGACGGGGACTTGGTTG | GGCGGGAGATGTGGGTAC |
| *HPRT1* | CAGCCCTGGCGTCGTGATTAGT | CCAGCAGGTCAGCAAAGAAT |

**Table S2**

Sequences of primer pairs used in determining the mRNA expression of tested genes.
